# Supplementary material for: Antiepileptic effects of exogenous β-hydroxybutyrate on kainic acid-induced epilepsy
Source: PubMed Central journal article supplement — Exp Ther Med. 2020 Oct 9;20(6):177. doi: 10.3892/etm.2020.9307 (PMC7579833; doi:10.3892/etm.2020.9307), 2020-10-09
Supplement: Supplementary_Data.pdf [file Supplementary_Data.pdf]

Table SI. P-values for the comparison of neuron-specific enolase between the two indicated groups at each time point.

| Comparison           | D1     | D3    | D7    |
|----------------------|--------|-------|-------|
| NS vs. NS + KA       | 0.001  | 0.036 | 0.085 |
| NS vs. BHB + KA      | 0.171  | 1.000 | 1.000 |
| NS vs. BHB           | 1.000  | 1.000 | 1.000 |
| NS + KA vs. BHB + KA | 0.010  | 0.200 | 0.121 |
| NS + KA vs. BHB      | <0.001 | 0.006 | 0.011 |
| BHB + KA vs. BHB     | 0.037  | 0.237 | 0.817 |

NS, normal saline; KA, kainic acid; BHB,  $\beta$ -hydroxybutyrate; D1, 1 day after KA administration; D3, 3 days after KA administration; D7, 7 days after KA administration.

Table SII. P-values for the comparison of glial fibrillary acidic protein between the two indicated groups at each time point.

| Comparison           | D1    | D3    | D7     |
|----------------------|-------|-------|--------|
| NS vs. NS + KA       | 0.793 | 0.037 | <0.001 |
| NS vs. BHB + KA      | 1.000 | 1.000 | 0.011  |
| NS vs. BHB           | 1.000 | 0.643 | 1.000  |
| NS + KA vs. BHB + KA | 1.000 | 0.033 | <0.001 |
| NS + KA vs. BHB      | 0.940 | 0.003 | <0.001 |
| BHB + KA vs. BHB     | 1.000 | 0.732 | 0.004  |

NS, normal saline; KA, kainic acid; BHB,  $\beta$ -hydroxybutyrate; D1, 1 day after KA administration; D3, 3 days after KA administration; D7, 7 days after KA administration.

Table SIII. P-values for the comparison of glutathione between the two indicated groups at each time point.

| Comparison           | D1     | D3    | D7     |
|----------------------|--------|-------|--------|
| NS vs. NS + KA       | <0.001 | 0.472 | <0.001 |
| NS vs. BHB + KA      | 0.083  | 1.000 | 1.000  |
| NS vs. BHB           | 1.000  | 1.000 | 1.000  |
| NS + KA vs. BHB + KA | <0.001 | 0.894 | <0.001 |
| NS + KA vs. BHB      | <0.001 | 0.390 | <0.001 |
| BHB + KA vs. BHB     | 0.169  | 1.000 | 0.942  |

NS, normal saline; KA, kainic acid; BHB,  $\beta$ -hydroxybutyrate; D1, 1 day after KA administration; D3, 3 days after KA administration; D7, 7 days after KA administration.

Table SIV. P-values for the comparison of  $\gamma$ -aminobutyric acid between the two indicated groups at each time point.

| Comparison           | D1     | D3    | D7     |
|----------------------|--------|-------|--------|
| NS vs. NS + KA       | <0.001 | 0.003 | <0.001 |
| NS vs. BHB + KA      | <0.001 | 1.000 | 0.081  |
| NS vs. BHB           | 1.000  | 1.000 | 1.000  |
| NS + KA vs. BHB + KA | <0.001 | 0.048 | <0.001 |
| NS + KA vs. BHB      | <0.001 | 0.006 | <0.001 |
| BHB + KA vs. BHB     | <0.001 | 1.000 | 0.239  |

NS, normal saline; KA, kainic acid; BHB,  $\beta$ -hydroxybutyrate; D1, 1 day after KA administration; D3, 3 days after KA administration; D7, 7 days after KA administration.
